# Supplementary material for: The Impact of Extreme Weather Events on Bacterial Communities and Opportunistic Pathogens in a Drinking Water Treatment Plant
Source: MDPI journal article supplement (doi:10.3390/w14010054), 2021-12-28
Supplement: s1 [file s1]

# The impact of extreme weather events on bacterial communities and opportunistic pathogens in a drinking water treatment plant

Wei Tang <sup>1</sup>, Yunsi Liu <sup>1</sup>, Qiuyan Li <sup>1</sup>, Ling Chen <sup>1,2</sup>, Qi Li <sup>3</sup>, Pan Li <sup>1,2,\*</sup>, and Shengji Xia <sup>1,2</sup>

- <sup>1</sup> School of Environmental Science and Engineering, Tongji University, Shanghai 200092, China; tangwei@tongji.edu.cn (W.T.); yusiemma@foxmail.com (Y.L.); liqiuyan\_hy@163.com (Q.L.); chenling@tongji.edu.cn (L.C.); xiashengji@tongji.edu.cn (S.X.)
- <sup>2</sup> School of Environmental Science and Engineering, State Key Laboratory of Control and Resource Reuse, Tongji University, Shanghai 200092, China
- <sup>3</sup> National Inland Waterway Regulation Engineering Research Center, Chongqing Jiaotong University, Chongqing 400074, China; liqi@cqjtu.edu.cn

Wei Tang and Yunsi Liu contributed equally to this work.

\* Correspondence: lipan@tongji.edu.cn

The SI contains 12 pages, which has 7 tables and 4 Figures.

---

**Table S1.** Construction of major treatment facilities in the DWTP.

| Treatment facility                       |               | Size of each tank (m) | Effective depth (m) |
|------------------------------------------|---------------|-----------------------|---------------------|
| Coagulation tank                         |               | 19.5 × 8.5            | 5.0                 |
| Horizontal flow sedimentation tank       |               | 112.2 × 8.5           | 3.6                 |
| V-type filtration tank                   |               | 15.0 × 7.0            | 2.4                 |
| Multiflo sedimentation tank <sup>1</sup> | Coagulation   | 6.7 × 6.7             | 6.5                 |
|                                          | Flocculation  | 15.0 × 6.0            | 7.5                 |
|                                          | Sedimentation | 15.0 × 15.0           | 7.1                 |
| TGV filtration tank <sup>2</sup>         |               | 16.4 × 6.1            | 3.2                 |
| Ozonation contact reactor                |               | 20.2 × 22.4           | 7.5                 |
| Biological activated carbon (BAC) tank   |               | 17.5 × 8.0            | 4.2                 |

<sup>1</sup> Multiflo sedimentation tank has been developed by Veolia Water Technologies, which contains three parts (coagulation, flocculation and sedimentation) for partial, normal or advanced removal of suspended solids, carbonaceous pollutants and phosphorous.

<sup>2</sup> TGV filtration tank, a high-rate filtration tank developed by Veolia Water Technologies, employs the familiar basic principle of rapid gravitational filtration of settled water through a granular media. The filtering bed is composed of single, dual or triple media layers.

**Table S2.** Physiochemical parameters of source water samples collected at different timepoints.

| Sample <sup>1</sup> | pH   | Temp (°C) | Turbidity (NTU) | NO <sub>3</sub> -N (mg/L) | NH <sub>3</sub> -N (mg/L) | DOC (mg/L) |
|---------------------|------|-----------|-----------------|---------------------------|---------------------------|------------|
| S1_Aut              | 7.32 | 20.1      | 48.3            | 7.0                       | 0.13                      | 2.29       |
| S2_Aut              | 7.71 | 20.8      | 23.3            | 2.7                       | 0.03                      | 2.26       |
| S3_Aut              | 7.85 | 20.3      | 17.1            | 3.5                       | 0.14                      | 2.13       |
| S4_Aut              | 7.29 | 19.5      | 18.3            | 5.0                       | 0.11                      | 1.96       |
| S1_Win              | 8.01 | 8.7       | 27.0            | 4.5                       | 0.29                      | 2.30       |
| S2_Win              | 7.95 | 8.5       | 18.8            | 5.0                       | 0.42                      | 2.97       |
| S1_Spr              | 8.03 | 17.4      | 16.8            | 2.8                       | 0.06                      | 1.69       |
| S2_Spr              | 7.74 | 18.0      | 14.1            | 2.5                       | 0.04                      | 1.59       |
| S1_Sum              | 7.69 | 24.2      | 26.1            | 5.2                       | 0.06                      | 2.21       |
| S2_Sum              | 7.71 | 25.6      | 40.2            | 4.0                       | 0.10                      | 2.31       |
| S3_Sum              | 7.77 | 26.0      | 26.4            | 4.9                       | 0.12                      | 2.26       |
| S4_Sum              | 7.77 | 25.4      | 25.8            | 5.7                       | 0.06                      | 2.33       |
| S1_Sum_R            | 7.80 | 25.2      | 23.6            | 3.6                       | 0.20                      | 2.53       |
| S2_Sum_R            | 7.73 | 25.6      | 28.4            | 4.9                       | /                         | 2.35       |
| S3_Sum_R            | 7.64 | 25.1      | 19.1            | 3.5                       | /                         | 3.91       |
| S4_Sum_R            | 7.69 | 25.0      | 19.8            | 3.8                       | 0.47                      | 3.40       |

<sup>1</sup> Different timepoints. Aut = autumn; Win = winter; Spr = spring; Sum = summer; Sum\_R = after summer rainfall.

**Table S3.** Physiochemical parameters of treated water samples collected at different timepoints.

| Sample <sup>1</sup> | pH   | Temp (°C) | Turbidity (NTU) | NO <sub>3</sub> -N (mg/L) | NH <sub>3</sub> -N (mg/L) | DOC (mg/L) | Total Cl <sub>2</sub> (mg/L) |
|---------------------|------|-----------|-----------------|---------------------------|---------------------------|------------|------------------------------|
| Raw water_Aut       | 7.64 | 20.1      | 29.8            | 5.0                       | 0.08                      | 2.14       | 0.14                         |
| Sedimentation_Aut   | 7.48 | 20.3      | 1.16            | 0.7                       | <0.01                     | 2.27       | 0.02                         |
| Multiflo_Aut        | 7.20 | 20.3      | 1.73            | 0.7                       | 0.05                      | 2.06       | <0.01                        |
| Filtration_Aut      | 7.56 | 20.4      | 0.11            | 1.1                       | 0.01                      | 1.79       | 0.36                         |
| TGV_Aut             | 6.97 | 22.9      | 0.11            | 1.3                       | <0.01                     | 2.02       | 0.22                         |
| O3-BAC_Aut          | 7.58 | 20.4      | 0.08            | 1.5                       | 0.02                      | 1.50       | <0.01                        |
| Disinfection_Aut    | 7.39 | 22.9      | 0.01            | 1.4                       | 0.04                      | 1.45       | 0.66                         |
| Raw water_Win       | 7.79 | 8.4       | 29.0            | 5.5                       | 0.15                      | 2.22       | 0.19                         |
| Sedimentation_Win   | 7.72 | 8.3       | 1.51            | 2.2                       | 0.22                      | 1.85       | 0.59                         |
| Multiflo_Win        | 7.68 | 8.4       | 1.12            | 2.0                       | 0.19                      | 1.78       | 0.63                         |
| Filtration_Win      | 8.20 | 8.4       | 0.11            | 1.8                       | 0.01                      | 1.76       | 0.36                         |
| TGV_Win             | 8.14 | 8.4       | 0.17            | 2.4                       | 0.01                      | 1.71       | 0.58                         |
| O3-BAC_Win          | 8.15 | 8.4       | 0.08            | 1.6                       | 0.18                      | 1.40       | <0.01                        |
| Disinfection_Win    | 8.14 | 9.1       | 0.08            | 1.9                       | <0.01                     | 1.45       | 0.44                         |
| Raw water_Spr       | 7.91 | 18.0      | 27.0            | 3.4                       | 0.05                      | 1.59       | 0.11                         |
| Sedimentation_Spr   | 7.85 | 20.3      | 0.86            | 1.1                       | <0.01                     | 1.46       | 0.24                         |
| Multiflo_Spr        | 7.88 | 18.1      | 1.0             | 0.7                       | 0.01                      | 1.40       | 0.17                         |
| Filtration_Spr      | 7.56 | 17.6      | 0.06            | 1.0                       | <0.01                     | 1.05       | 0.71                         |
| TGV_Spr             | 7.72 | 18.3      | 0.04            | 1.0                       | <0.01                     | 1.08       | 0.66                         |
| O3-BAC_Spr          | 7.74 | 18.6      | 0.04            | 0.4                       | <0.01                     | 1.13       | 0.04                         |
| Disinfection_Spr    | 7.90 | 18.3      | 0.09            | 0.7                       | <0.01                     | 1.05       | 0.74                         |
| Raw water_Sum       | 7.90 | 26.5      | 51.0            | 8.3                       | 0.07                      | 1.94       | 0.39                         |
| Sedimentation_Sum   | 7.73 | 30.7      | 0.93            | 1.0                       | <0.01                     | 2.01       | 0.14                         |
| Multiflo_Sum        | 7.82 | 26.4      | 1.60            | 1.4                       | <0.01                     | 1.90       | 0.15                         |
| Filtration_Sum      | 7.79 | 26.5      | 0.06            | 0.9                       | <0.01                     | 1.53       | 0.69                         |
| TGV_Sum             | 7.80 | 26.4      | 0.15            | 1.5                       | 0.10                      | 1.56       | 0.71                         |
| O3-BAC_Sum          | 7.73 | 26.5      | 0.08            | 1.6                       | <0.01                     | 1.67       | 0.03                         |
| Disinfection_Sum    | 7.75 | 26.4      | 0.11            | 1.0                       | <0.01                     | 1.57       | 0.71                         |
| Raw water_Sum_R     | 7.77 | 25.8      | 23.2            | 7.9                       | 0.07                      | 2.30       | 0.35                         |
| Sedimentation_Sum_R | 7.87 | 30.2      | 1.11            | 2.4                       | <0.01                     | 2.12       | 0.14                         |
| Multiflo_Sum_R      | 7.69 | 26.6      | 1.72            | 1.5                       | <0.01                     | 2.04       | 0.15                         |
| Filtration_Sum_R    | 7.65 | 26.7      | 0.09            | 1.3                       | <0.01                     | 1.62       | 0.86                         |
| TGV_Sum_R           | 7.69 | 26.7      | 0.24            | 2.3                       | <0.01                     | 1.64       | 0.91                         |
| O3-BAC_Sum_R        | 7.61 | 26.0      | 0.07            | 1.3                       | 0.02                      | 1.57       | 0.01                         |
| Disinfection_Sum_R  | 7.63 | 26.4      | 0.11            | 1.6                       | <0.01                     | 1.59       | 0.79                         |

<sup>1</sup> Same abbreviation as **Table S2**.

**Table S4.** Physiochemical parameters of water samples collected during typhoon period.

| Sample <sup>1</sup> | pH   | Temp<br>(°C) | Turbidity<br>(NTU) | NO <sub>3</sub> -N<br>(mg/L) | NH <sub>3</sub> -N<br>(mg/L) | Total Cl <sub>2</sub><br>(mg/L) |
|---------------------|------|--------------|--------------------|------------------------------|------------------------------|---------------------------------|
| Before SW           | 8.11 | 30.6         | 31.2               | 3.8                          | 0.05                         |                                 |
| BeforeRW            | 8.01 | 30.6         | 32.8               | 5.0                          | 0.07                         | 0.12                            |
| Before FW           | 7.76 | 30.3         | 0.18               | 1.2                          | 0.01                         | 0.66                            |
| During SW           | 8.06 | 29.8         | 41.6               | 3.6                          | 0.05                         |                                 |
| DuringRW            | 7.96 | 29.5         | 41.4               | 7.4                          | 0.04                         | 0.26                            |
| During FW           | 7.73 | 29.3         | 0.20               | 1.5                          | 0.02                         | 0.88                            |
| After1RW            | 7.98 | 29.1         | 39.1               | 2.1                          | 0.05                         | 0.37                            |
| After1 FW           | 7.76 | 29.1         | 0.16               | 4.3                          | 0.01                         | 0.73                            |
| After2 SW           | 8.13 | 28.9         | 35.1               | 1.7                          | 0.04                         |                                 |
| After2RW            | 8.03 | 28.8         | 38.3               | 2.9                          | 0.02                         | 0.25                            |
| After2 FW           | 7.74 | 28.7         | 0.09               | 0.9                          | 0.01                         | 0.66                            |
| After3 SW           | 8.16 | 29.6         | 33.5               | 3.0                          | 0.05                         |                                 |
| After3RW            | 8.06 | 29.5         | 35.9               | 4.0                          | 0.09                         | 0.34                            |
| After3 FW           | 7.73 | 29.2         | 0.08               | 1.7                          | 0.03                         | 0.71                            |

<sup>1</sup> SW = source water; RW = raw water; FW = finished water; After1, 2, and 3 = after one, two and three days of the typhoon event; Before = before the typhoon event.

**Table S5.** PCR primers, probes, and annealing temperatures used in this study. <sup>1</sup>

| Targeted organism         | Targeted gene | Sequences (5'-3')                                                                                               | Annealing temperature | Reference |
|---------------------------|---------------|-----------------------------------------------------------------------------------------------------------------|-----------------------|-----------|
| Total Bacteria            | 16S rRNA      | 1368F:CGGTGAATACGTTTCYCGG<br>1492R:GGWTACCTTGTTACGACTT                                                          | 55°C                  | [1]       |
| <i>Legionella</i> spp.    | 23S rRNA      | Leg23SF: CCCATGAAGCCCGTTGAA<br>Leg23SR:ACAATCAGCCAATTAGTACGAGTTAC<br>Probe:<br>FAM-TCCACACCTCGCCTATCAACGTCGTAGT | 58.5°C                | [2]       |
| <i>L. pneumophila</i>     | <i>mip</i>    | LmipF:AAAGGCATGCAAGACGCTATG<br>LmipR:<br>GAAACTTGTTAAGAACGTCTTTCATTTG<br>Probe: FAM-TGGCGCTCAATTGGCTTTAACCGA    | 60°C                  | [2]       |
| <i>Mycobacterium</i> spp. | 16S rRNA      | 110F: CCTGGGAAACTGGGTCTAAT<br>I571R: CGCACGCTCACAGTTA<br>Probe: FAM-TTTCACGAACAACGCGACAAACT                     | 56°C                  | [3]       |
| <i>M. avium</i>           | 16S rRNA      | MycavF: AGAGTTTGATCCTGGCTCAG<br>MycavR: ACCAGAAGACATGCGTCTTG                                                    | 64°C                  | [4]       |

<sup>1</sup> DNA standards were obtained by amplifying target genes cloned to plasmids (TOPO® TA cloning® kit, Carlsbad, CA) using vector-specific primer M13F and M13R. M13 PCR products were quantified and then diluted to obtain a series of 10-fold DNA standards.

**Table S6.** The numbers of gene copies of *Mycobacterium* spp., *Legionella* spp. and *Legionella pneumophila* in biofilm from the top (B1), middle (B2) and bottom (B3) of the reactor. These samples were collected in the fourth, fifth and sixth months after the start of operation of BAC filtration in the water treatment plant.

| Target pathogens          | Sample | Concentration (copies/g) |                      |                      |
|---------------------------|--------|--------------------------|----------------------|----------------------|
|                           |        | 4th month                | 5th month            | 6th month            |
| <i>Legionella</i> spp.    | B1     | 1.40×10 <sup>5</sup>     | 3.84×10 <sup>6</sup> | 4.37×10 <sup>4</sup> |
|                           | B2     | 2.53×10 <sup>5</sup>     | 2.81×10 <sup>6</sup> | 2.46×10 <sup>4</sup> |
|                           | B3     | 1.76×10 <sup>5</sup>     | /                    | 2.07×10 <sup>4</sup> |
| <i>L. pneumophila</i>     | B1     | /                        | 7.22×10 <sup>3</sup> | /                    |
|                           | B2     | /                        | 1.54×10 <sup>4</sup> | /                    |
|                           | B3     | /                        | /                    | /                    |
| <i>Mycobacterium</i> spp. | B1     | 1.96×10 <sup>3</sup>     | 8.03×10 <sup>3</sup> | 3.48×10 <sup>3</sup> |
|                           | B2     | 4.34×10 <sup>3</sup>     | /                    | 1.64×10 <sup>3</sup> |
|                           | B3     | /                        | 2.73×10 <sup>3</sup> | 2.13×10 <sup>3</sup> |

**Table S7.** Correlations between water quality parameters of source water and gene copies of bacteria and opportunistic pathogens.

|                           | pH    | Temp (°C) | Turbidity (NTU) | NO <sub>3</sub> -N (mg/L) | NH <sub>4</sub> -N (mg/L) | DOC (mg/L)     |
|---------------------------|-------|-----------|-----------------|---------------------------|---------------------------|----------------|
| Total bacteria            | 0.10  | 0.10      | -0.08           | 0.09                      | <b>0.84</b> **            | <b>0.66</b> ** |
| <i>Mycobacterium</i> spp. | -0.05 | 0.29      | -0.16           | -0.12                     | <b>0.70</b> **            | <b>0.73</b> ** |
| <i>Legionella</i> spp.    | -0.11 | 0.43      | -0.07           | -0.09                     | 0.63                      | <b>0.77</b> ** |
| <i>L. pneumophila</i>     | -0.05 | 0.45      | -0.28           | -0.34                     | <b>0.83</b> **            | <b>0.90</b> ** |

\*  $p < 0.05$

\*\*  $p < 0.01$



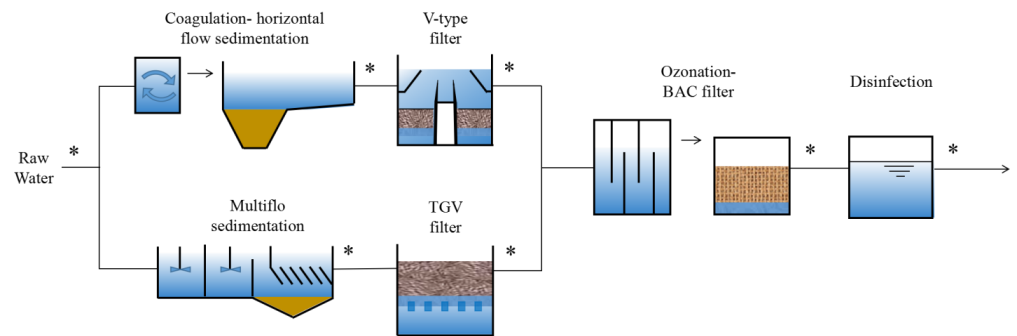

**Figure S1.** Schematic diagram of the drinking water treatment plant with two trains of treatment processes. Water samples were taken at the locations indicated by an asterisk (\*).

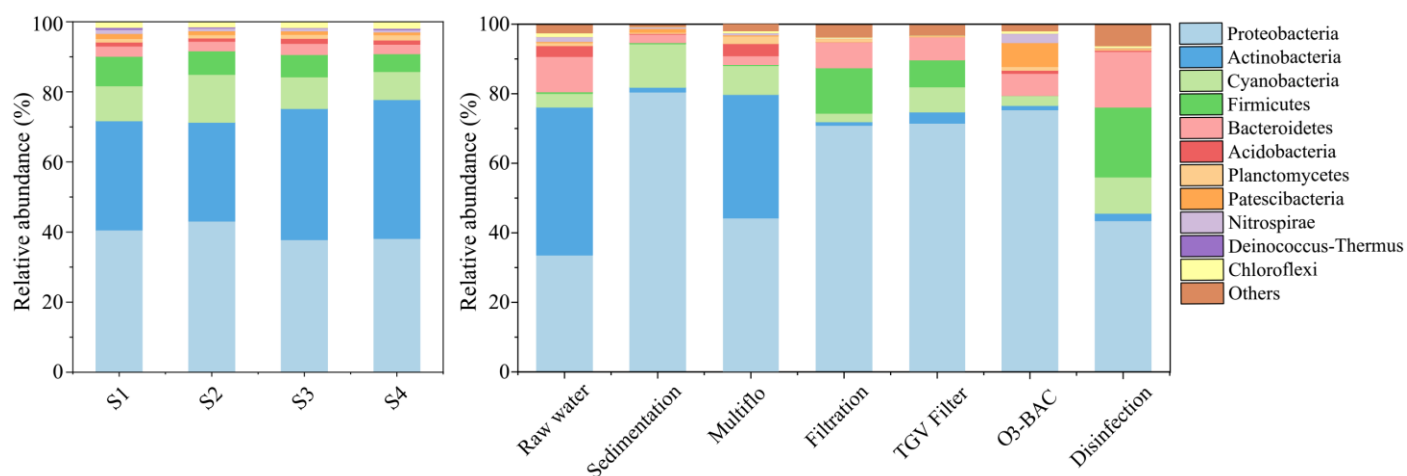

**Figure S2.** The annual average relative abundance of dominant taxa at the phylum level (a) in source water samples from four different sampling sites and (b) in water samples at each treatment step. The legend shows the most abundant phyla in these samples. The height of the color bar represents the percentage of each taxon in the microbial community.

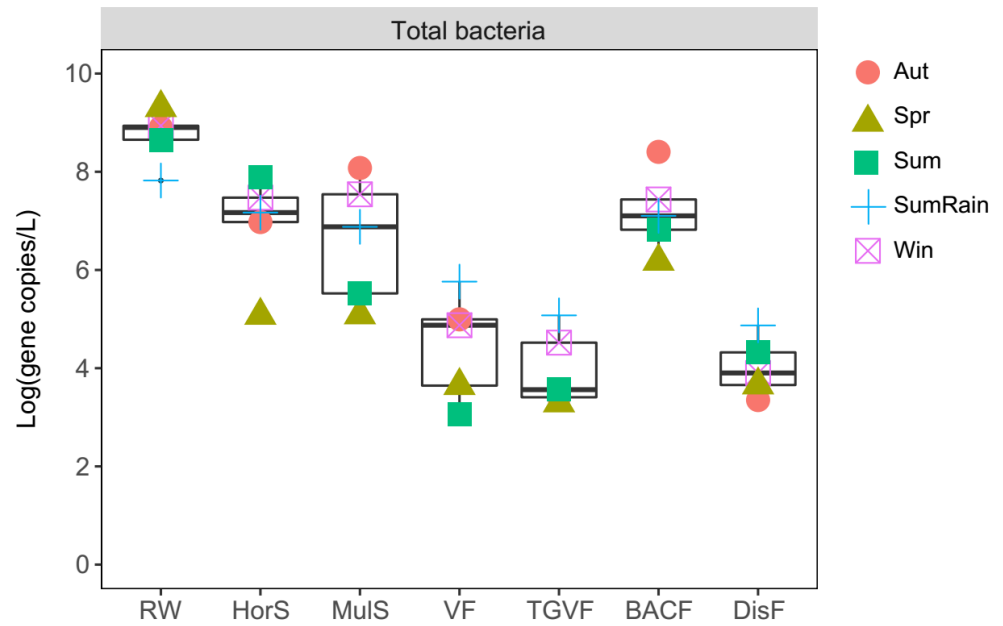

**Figure S3.** Total 16S rRNA gene copy number at various stages of the water treatment process at different time points. RW, HorS, MulS, VF, TGVF, BACF, and DisF was the abbreviation of raw water, horizontal flow sedimentation, Multiflo sedimentation, V-type filtration, TGV filtration, O3-BAC filtration, and disinfection, respectively. The different colors and shapes represent different seasons. The results of summer rainfall sample were removed due to insufficient DNA volume which can not be used to verify the primary qPCR results.

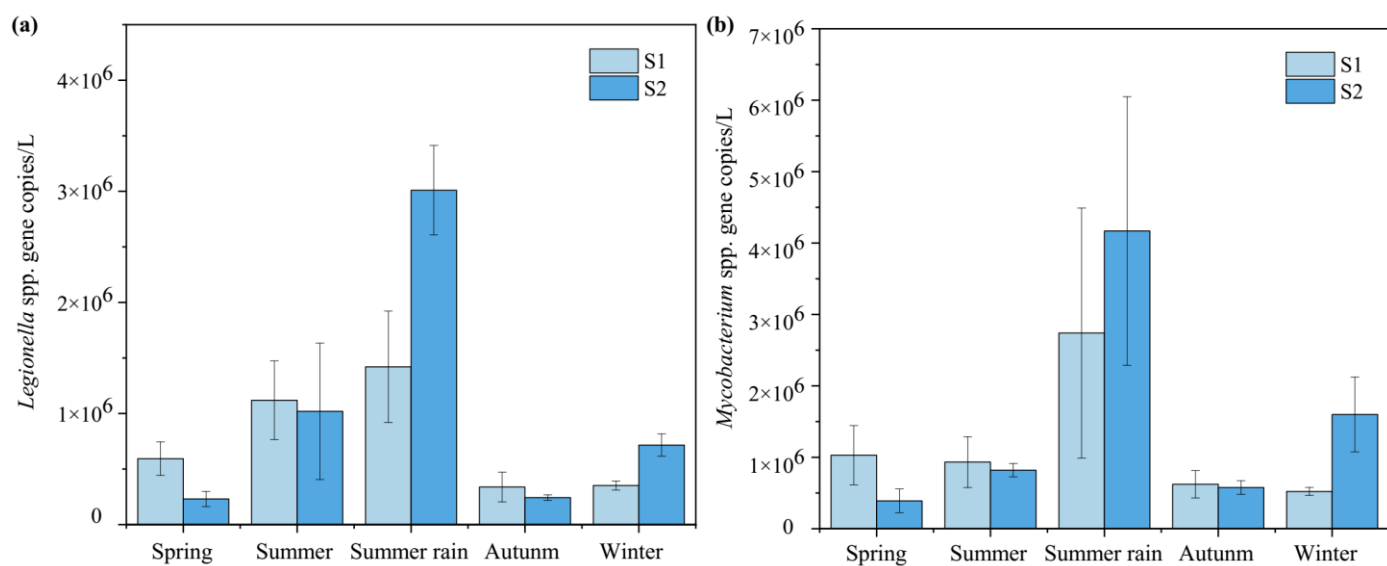

**Figure S4.** (a) *Legionella* spp. and (b) *Mycobacterium* spp. in water samples from the intake (S1) and alternative intake (S2) of source water at different time points.

---

## References

1. Suzuki, M.T.; Taylor, L.T.; DeLong, E.F. Quantitative analysis of small-subunit rRNA genes in mixed microbial populations via 5'-nuclease assays. *Appl. Environ. Microbiol.* **2000**, *66*, 4605–4614. DOI: 10.1128/AEM.66.11.4605-4614.2000
2. Nazanian, E.J.; Bopp, D.J.; Saylor, A.; Limberger, R.J.; Musser, K.A. Design and implementation of a protocol for the detection of *Legionella* in clinical and environmental samples. *Diagn. Microbiol. Infect. Dis.* **2008**, *62*, 125–132. DOI: 10.1016/j.diagmicrobio.2008.05.004
3. Radomski, N.; Lucas, F.S.; Moilleron, R.; Cambau, E.; Haenn, S.; Moulin, L. Development of a real-time qPCR method for detection and enumeration of *Mycobacterium* spp. in surface water. *Appl. Environ. Microbiol.* **2010**, *76*, 7348–7351. DOI: 10.1128/AEM.00942-10
4. Wilton, S.; Cousins, D. Detection and identification of multiple mycobacterial pathogens by DNA amplification in a single tube. *Genome Res.* **1992**, *1*, 269–273. DOI: 10.1101/gr.1.4.269
